# Supplementary material for: Integrative Metagenomic and Culture-Based Profiling of Vaginal Microbiome Diversity among Ethnic Groups in Armenia
Source: Research Square preprint supplement (doi:10.21203/rs.3.rs-8186315/v1), 2026-01-29
Supplement: Supplementary file 1 [file 1a0306cc11bcf2c4e323287b.docx]

**Supplementary Materials**

**Integrative Metagenomic and Culture-Based Profiling of Vaginal Microbiome Diversity among Ethnic Groups in Armenia**

**Authors**

Aleksanyan Tigran1, Simonyan Rima1, Harutyunyan Ruzanna1, Semerjyan Inesa1, Gharibyan Edita2, Dimov Svetoslav Gueorguiev3, Vandamme Peter4, Panosyan Hovik5,6, Bazukyan Inga1,6

*Corresponding author. *Email addresses and telephones*: [hpanosyan@ysu.am](mailto:hpanosyan@ysu.am), +374 94 719590 (H. Panosyan); [bazukyan](mailto:bazukyan)@ysu.am, +39 0818675118 (I. Bazukyan).

**Affiliations**

1Department of Biochemistry, Microbiology and Biotechnology, Yerevan State University, Alex Manoogian 1, 0025, Yerevan, Armenia

2Department of Pregnancy Pathology, Erebuni Medical Center, Titogradyan Street 14, 0087, Yerevan,  Armenia Yerevan, Armenia

3Faculty of Biology, Sofia University St. Kliment Ohridski, Tzar Osvoboditel Blvd. 15, 1504, Sofia. Bulgaria

4Faculty of Science, Ghent University, Campus Ledeganck, K. L. Ledeganckstraat 35, 9000 Ghent, Belgium

5Department of Biomedical Sciences, Institute of Pharmacy, Yerevan State University, Alex Manoogian 1, 0025, Yerevan, Armenia

6Research Institute of Biology, Biology Faculty, Yerevan State University, Alex Manoogian 1, 0025, Yerevan, Armenia

Molokans are a Spiritual Christian group, which rejected the ritualism and the hierarchy of the Russian Orthodox Church. They originated in Russia in the 18th century, however, in the 19th century they were resettled by Tsarist Russia to the Caucasus region, where they created several villages. At the present time, Molokans comprise one of the ethnic minority groups in Armenia [1]. According to the Armenian census of 2022, there are approximately 2000 Molokans living in the Republic of Armenia, mostly in Lori province (villages Fioletovo and Lermontovo) [2]. Molokans have their unique culture and beliefs. They rigorously preserve communal identity by maintaining their traditional lifestyle and practicing strict endogamy. There are two common versions for the etymology of the name “Molokan”; according to the first one, it comes from the Russian word “moloko” which means milk, because it is habitual for them to drink milk during the abstinence, while the second version claims that their faith is clean as the white milk. The main occupation of Molokans in Armenia is cattle breeding and farming. They are especially renowned for their pickled cabbage [3].

Yezidis make up the largest ethnic minority group in Armenia. The most important element of their identity is their religion - Yezidism. Yezidis originated during the 11th-13th centuries in Northern Iraq (Sinjar). In the 19th-20th centuries Yezidis migrated from the Ottoman Empire to Transcaucasia (Armenia and Georgia) in order to escape persecutions and permanent harassment by Ottoman authorities [4]. According to the 2011 Armenian census, there are approximately 35.000 Yezidis currently living in Armenia [5]. Most of them inhabit the surroundings of Mount Aragats; Aragatsotn, Armavir, Ararat, and Kotayk regions [6]. Since they mostly live in rural and suburban areas, their main occupation is sheep breeding and sometimes plant breeding. Yezidis practice their distinctive culture and have their food preferences. The traditional food of Yezidis is mainly based on meat (never pork), milk products (yogurt, cheese, curd,), cereals, grains and herbs. avoid pork, cabbage. Since Yezidis live a semi-nomadic lifestyle, it is quite common for them to gather wild plants and use them in their traditional dishes. Yezidis strictly avoid pork and cabbage, according to their holy Black Book, lettuce, common bean, pumpkins, bamia (okra), fish, deer, roosters are forbidden types of food for Yezidis [7].

**References**

1. <https://en.wikipedia.org/wiki/Molokans_in_Armenia#Further_reading>
2. <https://www.armstat.am/en/?nid=82&id=2623>
3. <https://phoenixtour.org/blog/molokans-adding-ethnic-color-to-a-homogeneous-armenia/>
4. <https://www.minorities-network.org/wp-content/uploads/2014/09/The-ethnic-minorities-of-Armenia.pdf>
5. [https://webarchive.archive.unhcr.org/20230518141040/https://www.refworld.org/docid/5790d0834.html](https://webarchive.archive.unhcr.org/20230518141040/https:/www.refworld.org/docid/5790d0834.html)
6. Asatrian GS and Poladian AP. The religion of the Yezidis. Hist-Phil J 1989;4:131e50 [In Armenian].
7. Hovsepyan R, Stepanyan-Gandilyan N, Melkumyan H, Harutyunyan L (2016) Food as a marker for economy and part of identity: traditional vegetal food of Yezidis and Kurds in Armenia, Journal of Ethnic Foods, Volume 3, Issue 1, pp 32-41. <https://doi.org/10.1016/j.jef.2016.01.003>

**Table S1.** Study of vaginal microbiome with classical microbiological methods

| Sample | Colony forming unit, CFU/1 ml of sample | | | | |
| --- | --- | --- | --- | --- | --- |
| MRS | Endo | Sabouraud | Nutrient agar | |
| Yerevan area (Armenians) | | | | |
| G3 | 2.3x105 | 0 | 33 | 6.7 x102 | |
| G4 | 7.8x106 | 4.4x103 | 2.3x108 | 4.3x108 | |
| G5 | 15 | 0 | 0 | 0 | |
| G6 | 9x104 | 1 | 15 | 18 | |
| G7 | 1.9x103 | 68 | 7x102 | 1.1x103 | |
| G8 | 6.5x102 | 1.4x102 | 2.5x103 | 8x102 | |
| G9 | 1x104 | 0 | 5.4x103 | 1x102 | |
| G10 | 2.6x102 | 0 | 17x102 | 0 | |
| G11 | 3.5x105 | 53 | 1.3x105 | 1.8x105 | |
| G12 | 44 | 28 | 51 | 0 | |
| G13 | 2.2x104 | 0 | 3x106 | 5 | |
| G14 | 8 | 0 | 0 | 1x105 | |
| G15 | 2.8x105 | 7 | 2.8x105 | 4.3x104 | |
| G17 | 7.5x103 | 7 | 2x103 | 5x104 | |
| G18 | 6x102 | 0 | 0 | 1.8x104 | |
| G19 | 45x104 | 1 | 13x102 | 27x106 | |
| G20 | 40x102 | 0 | 1.4x103 | 3.1x102 | |
| G21 | 9x106 | 0 | 6.6x106 | 2.8x106 | |
| G22 | 18x102 | 0 | 7x102 | 2.2x103 | |
| G24 | 4.8x105 | 0 | 1.3x103 | 1.4x105 | |
| G25 | 3x105 | 0 | 1.3x103 | 1.9x103 | |
| G26 | 9.3x103 | 4x102 | 7x105 | 5x105 | |
| G28 | 0 | 0 | 0 | 1 | |
| G29 | 0 | 0 | 9.7x105 | 1.3x103 | |
| G30 | 3x106 | 2.1x103 | 1.62x106 | 1.8x105 | |
| G31 | 2x106 | 1.5x104 | 3.3x105 | 1x105 | |
| G42 | 3.6x103 | 9x102 | 1.5x103 | 1.6x103 | |
| Sample | Colony forming unit, CFU/sample | | | | |
| MRS | Endo | Sabouraud | Nutrient agar | |
| Yerevan area (Armenians) | | | | |
| G43 | 1.2x104 | 2 | 2.3x103 | 6.5x103 | |
| Aragatsotn province (Yezidis) | | | | | |
| G32 | 5.8x105 | 1x102 | 5x104 | 5.6x105 | |
| G33 | 9x106 | 32 | 8x105 | 2.4x106 | |
| G34 | 1.9x105 | 3x104 | 1.1x105 | 3.2x105 | |
| G35 | 1.4x105 | 0 | 1.2x105 | 2.6x105 | |
| G36 | 3x102 | 4 | 2x102 | 4x106 | |
| G37 | 5x104 | 0 | 1.5x104 | 3x104 | |
| G38 | 4.2x102 | 36 | 2.6x102 | 1x103 | |
| G39 | 4x102 | 0 | 4x104 | 6x102 | |
| G40 | 3x106 | 3.4x103 | 2x106 | 2x106 | |
| G41 | 1x106 | 13 | 1x106 | 1x106 | |
| G44 | 1x103 | 0 | 9 | 1x102 | |
| G45 | 1x103 | 0 | 12 | 1.5x103 | |
| G46 | 20 | 0 | 18 | 1.7x102 | |
| G47 | 8 | 0 | 3 | 1.6x102 |
| G48 | 1x103 | 0 | 44 | 3.3x103 | |
| Lori province (Molokans) | | | | | |
| G16 | 3.2x108 | 5.6x102 | 3.2x106 | 4x106 | |
| G 22 | 3.6 x103 | 0 | 1.4 x103 | 4.4 x103 | |
| G49 | 3x104 | 0 | 1.7x105 | 1.6x105 | |
| G50 | 3.5x106 | 0 | 4.2x106 | 2x106 | |
| G51 | 8x106 | 0 | 2.1x106 | 3.9x105 | |
| G52 | 2.7x106 | 0 | 1.5x108 | 1x108 | |
| G53 | 3.7x105 | 2.3x105 | 1.5x106 | 5.2x106 | |
| G54 | 1.4x106 | 5 | 9.2x105 | 4.8x105 | |
| G55 | 43 | 0 | 1x102 | 1.1x105 | |
| G56 | 3.5x104 | 0 | 7.1x105 | 1x106 | |
| G57 | 6.7x105 | 0 | 7.2x105 | 9.8x105 | |
| Sample | Colony forming unit, CFU/sample | | | | |
| MRS | Endo | Sabouraud | Nutrient agar | |
| Lori province (Molokans) | | | | |
| G58 | 1.17x106 | 0 | 3.5x105 | 14 | |
| G59 | 3x106 | 2.6x106 | 2.6x106 | 5.2x106 | |
| G60 | 2.7x105 | 3.6x103 | 5.9x104 | 3.6x105 | |
| G61 | 3.1x105 | 44 | 2.5x104 | 2x105 | |
| G62 | 6x106 | 1.9x103 | 8x105 | 3x106 | |
| G63 | 0 | 0 | 0 | 0 | |
| G64 | 2.4x107 | 1.3x105 | 1.2x108 | 1.2x105 | |
| G65 | 3.5x06 | 0 | 3x106 | 2x106 | |
| G66 | 8x104 | 0 | 1.2x103 | 2.3x104 | |
| G67 | 1.55x106 | 2.35x106 | 2.42x105 | 2.61x106 | |
| G68 | 3.74x103 | 3.7x105 | 4.2x104 | 5.9x104 | |

Red – patients with dysbiosis, green – pregnant patients, white – healthy patients
